# Supplementary material for: Design, Synthesis and Antifungal Activity Evaluation of New Thiazolin-4-ones as Potential Lanosterol 14α-Demethylase Inhibitors
Source: PubMed Central journal article supplement (PMC5297809; doi:10.3390/ijms18010177), 2017-01-17
Supplement: ijms-18-00177-s001.pdf [file ijms-18-00177-s001.pdf]

# Supplementary Materials: Design, Synthesis and Antifungal Activity Evaluation of New Thiazolin-4-ones as Potential Lanosterol 14 $\alpha$ -Demethylase Inhibitors

Anca Stana, Dan C. Vodnar, Radu Tamaian, Adrian Pîrnău, Laurian Vlase, Ioana Ionuț, Ovidiu Oniga and Brîndușa Tiperciuc

**Table S1.** The results of VS carried out for detection of non-peptidic inhibitors of PPI and UMSs (with prediction of toxicity risks).

| ID | PPI Friendly | UMSs                                 |                |                        |
|----|--------------|--------------------------------------|----------------|------------------------|
|    |              | Detected Functional Group            | Main Mechanism | Alternative Mechanisms |
| 2  | No           | LR: Michael acceptors (double bonds) | Warhead        | -                      |
|    |              | LR: terminal vinyl                   | Problematic    | -                      |
| 3a | No           | HR: Michael acceptors (double bonds) | Warhead        | -                      |
|    |              | LR: terminal vinyl                   | Problematic    | -                      |
| 3b | No           | HR: Michael acceptors (double bonds) | Warhead        | -                      |
|    |              | LR: terminal vinyl                   | Problematic    | -                      |
| 3c | No           | HR: Michael acceptors (double bonds) | Warhead        | -                      |
|    |              | LR: nitro                            | Reactive       | Binder                 |
|    |              | LR: nitrobenzene                     | Reactive       | CovB, DNAB             |
|    |              | LR: terminal vinyl                   | Problematic    | -                      |
| 3d | No           | HR: Michael acceptors (double bonds) | Warhead        | -                      |
|    |              | LR: terminal vinyl                   | Problematic    | -                      |
|    |              | LR: thiazole                         | Oxidative      | -                      |
| 3e | No           | HR: Michael acceptors (double bonds) | Warhead        | -                      |
|    |              | LR: terminal vinyl                   | Problematic    | -                      |
| 3f | No           | HR: Michael acceptors (double bonds) | Warhead        | -                      |
|    |              | LR: terminal vinyl                   | Problematic    | -                      |
| 3g | No           | HR: Michael acceptors (double bonds) | Warhead        | -                      |
|    |              | LR: phenol                           |                |                        |
| 3h | No           | LR: terminal vinyl                   | Problematic    | -                      |
|    |              | HR: Michael acceptors (double bonds) | Warhead        | -                      |
| 5  | No           | not detected                         | -              | -                      |
| 6a | No           | LR: Michael acceptors (double bonds) | Warhead        | -                      |
| 6b | No           | LR: Michael acceptors (double bonds) | Warhead        | -                      |
|    |              | LR: Michael acceptors (double bonds) | Warhead        | -                      |
| 6c | Yes          | LR: Michael acceptors (double bonds) | Warhead        | -                      |
|    |              | LR: nitro                            | Reactive       | Binder                 |
| 6d | Yes          | LR: nitrobenzene                     | Reactive       | CovB, DNAB             |
|    |              | LR: Michael acceptors (double bonds) | Warhead        | -                      |
| 6e | Yes          | LR: thiazole                         | Oxidative      | -                      |
|    |              | LR: Michael acceptors (double bonds) | Warhead        | -                      |
| 8  | No           | not detected                         | -              | -                      |
| 9a | Yes          | LR: Michael acceptors (double bonds) | Warhead        | -                      |
| 9b | Yes          | LR: Michael acceptors (double bonds) | Warhead        | -                      |
|    |              | LR: Michael acceptors (double bonds) | Warhead        | -                      |
| 9c | Yes          | LR: Michael acceptors (double bonds) | Warhead        | -                      |
|    |              | LR: nitro                            | Reactive       | Binder                 |
| 9d | Yes          | LR: nitrobenzene                     | Reactive       | CovB, DNAB             |
|    |              | LR: Michael acceptors (double bonds) | Warhead        | -                      |
| 9e | Yes          | LR: thiazole                         | Oxidative      | -                      |
|    |              | LR: Michael acceptors (double bonds) | Warhead        | -                      |

Table S1. Cont.

| ID  | PPI Friendly | UMSs                      |                |                        |
|-----|--------------|---------------------------|----------------|------------------------|
|     |              | Detected Functional Group | Main Mechanism | Alternative Mechanisms |
| 10  | No           | -                         | -              | -                      |
| 11  | No           | -                         | -              | -                      |
| Flu | No           | HR: triazole              | CYP450i        | CYP450B                |
| Ket | Yes          | LR: cyclic acetal         | Problematic    | -                      |
|     |              | LR: imidazole             | CYP-OXs        | CYP450B                |

LR: low risk UMSs detected; HR: high risk UMSs detected; - Indicates not detected UMSs/mechanisms; Warhead: functional group responsible for electrophilic protein-reactive false positives; Problematic: functional group with inherent or indirect toxicity; Reactive (metabolite): structural alert requiring metabolism to generate a reactive metabolite (can form adducts with endogenous biomolecules); Binder: indicate the existence of all following binding mechanisms: covalent binding (Cov: problematic group involved in covalent binding with biological macromolecules), CYP450 binding (CYP45B: structural alerts exhibiting tight binding to CYP450s enzymes), DNA binding (DNA: structural alert with a propensity for DNA binding); Oxidative: oxidative ring scission catalyzed by P450 enzymes resulting in the formation of the corresponding  $\alpha$ ; CYP450i: structural alert requiring metabolism to generate a reactive metabolite which inhibits P450 enzymes; CYP-OXs: structural alert referring at a reactive metabolite used as substrate for CYP oxidation

**Table S2.** The results of VS carried out for detection of covalent inhibitors and PAINS (with resolution from the build-in decisional three).

| ID | Detected Covalent Inhibitors                                                 | PAINS    |                              |          |
|----|------------------------------------------------------------------------------|----------|------------------------------|----------|
|    |                                                                              | Filter A | Filter B                     | Filter C |
| 2  | Michael acceptors (double bonds)                                             | Accepted | Accepted                     | Accepted |
| 3a | Michael acceptors (double bonds)<br>$\alpha$ , $\beta$ -unsaturated carbonyl | Accepted | Intermediate <sup>(90)</sup> | Accepted |
| 3b | Michael acceptors (double bonds)<br>$\alpha$ , $\beta$ -unsaturated carbonyl | Accepted | Intermediate <sup>(90)</sup> | Accepted |
| 3c | Michael acceptors (double bonds)<br>$\alpha$ , $\beta$ -unsaturated carbonyl | Accepted | Intermediate <sup>(90)</sup> | Accepted |
| 3d | Michael acceptors (double bonds)<br>$\alpha$ , $\beta$ -unsaturated carbonyl | Accepted | Intermediate <sup>(90)</sup> | Accepted |
| 3e | Michael acceptors (double bonds)<br>$\alpha$ , $\beta$ -unsaturated carbonyl | Accepted | Intermediate <sup>(90)</sup> | Accepted |
| 3f | Michael acceptors (double bonds)<br>$\alpha$ , $\beta$ -unsaturated carbonyl | Accepted | Intermediate <sup>(90)</sup> | Accepted |
| 3g | Michael acceptors (double bonds)<br>$\alpha$ , $\beta$ -unsaturated carbonyl | Accepted | Intermediate <sup>(90)</sup> | Accepted |
| 3h | Michael acceptors (double bonds)<br>$\alpha$ , $\beta$ -unsaturated carbonyl | Accepted | Intermediate <sup>(90)</sup> | Accepted |
| 5  | -                                                                            | Accepted | Accepted                     | Accepted |
| 6a | Michael acceptors (double bonds)<br>$\alpha$ , $\beta$ -unsaturated carbonyl | Accepted | Intermediate <sup>(90)</sup> | Accepted |
| 6b | Michael acceptors (double bonds)<br>$\alpha$ , $\beta$ -unsaturated carbonyl | Accepted | Intermediate <sup>(90)</sup> | Accepted |
| 6c | Michael acceptors (double bonds)<br>$\alpha$ , $\beta$ -unsaturated carbonyl | Accepted | Intermediate <sup>(90)</sup> | Accepted |
| 6d | Michael acceptors (double bonds)<br>$\alpha$ , $\beta$ -unsaturated carbonyl | Accepted | Intermediate <sup>(90)</sup> | Accepted |
| 6e | Michael acceptors (double bonds)<br>$\alpha$ , $\beta$ -unsaturated carbonyl | Accepted | Intermediate <sup>(90)</sup> | Accepted |
| 8  | -                                                                            | Accepted | Accepted                     | Accepted |

Table S2. Cont.

| ID  | Detected Covalent Inhibitors                                                 | PAINS                         |                              |          |
|-----|------------------------------------------------------------------------------|-------------------------------|------------------------------|----------|
|     |                                                                              | Filter A                      | Filter B                     | Filter C |
| 9a  | Michael acceptors (double bonds)<br>$\alpha$ , $\beta$ -unsaturated carbonyl | Accepted                      | Intermediate <sup>(90)</sup> | Accepted |
| 9b  | Michael acceptors (double bonds)<br>$\alpha$ , $\beta$ -unsaturated carbonyl | Accepted                      | Intermediate <sup>(90)</sup> | Accepted |
| 9c  | Michael acceptors (double bonds)<br>$\alpha$ , $\beta$ -unsaturated carbonyl | Accepted                      | Intermediate <sup>(90)</sup> | Accepted |
| 9d  | Michael acceptors (double bonds)<br>$\alpha$ , $\beta$ -unsaturated carbonyl | Accepted                      | Intermediate <sup>(90)</sup> | Accepted |
| 9e  | Michael acceptors (double bonds)<br>$\alpha$ , $\beta$ -unsaturated carbonyl | Accepted                      | Intermediate <sup>(90)</sup> | Accepted |
| 10  | -                                                                            | Accepted                      | Accepted                     | Accepted |
| 11  | -                                                                            | Accepted                      | Accepted                     | Accepted |
| Flu | -                                                                            | Accepted                      | Accepted                     | Accepted |
| Ket | -                                                                            | Intermediate <sup>(246)</sup> | Accepted                     | Accepted |

- Indicates not detected covalent inhibitors; Accepted: compounds with no structural alerts for PAINS and, concomitantly, satisfying the physicochemical filter (those results are displayed in Table 6); Intermediate: compounds which embeds low-risk structural PAINS alerts with a number of occurrences below the threshold (to not be confused with the intermediate thiazolin-4-one derivatives, which are reaction intermediates); <sup>(90)</sup> PAIN substructure filter name: ene\_five\_het\_B; <sup>(246)</sup> PAIN substructure filter name: anil\_di\_alk\_C.

**Table S3.** The results of VS carried out for drug safety profiling.

| ID  | 4/400 Rule | 3/75 Rule | Phospholipidosis | MedChem Rules<br>(Rule Name)                               |
|-----|------------|-----------|------------------|------------------------------------------------------------|
| 2   | good       | warning   | non inducer      | isothiourea_sulfonamide                                    |
| 3a  | good       | bad       | non inducer      | isothiourea_sulfonamide                                    |
| 3b  | good       | bad       | non inducer      | isothiourea_sulfonamide                                    |
| 3c  | good       | good      | non inducer      | isothiourea_sulfonamide                                    |
| 3d  | good       | warning   | non inducer      | isothiourea_sulfonamide                                    |
| 3e  | good       | warning   | non inducer      | isothiourea_sulfonamide                                    |
| 3f  | good       | bad       | non inducer      | isothiourea_sulfonamide                                    |
| 3g  | good       | good      | non inducer      | isothiourea_sulfonamide                                    |
| 3h  | good       | good      | non inducer      | isothiourea_sulfonamide                                    |
| 5   | good       | warning   | non inducer      | isothiourea_sulfonamide                                    |
| 6a  | good       | bad       | non inducer      | isothiourea_sulfonamide                                    |
| 6b  | good       | bad       | non inducer      | isothiourea_sulfonamide                                    |
| 6c  | good       | warning   | non inducer      | isothiourea_sulfonamide                                    |
| 6d  | good       | warning   | non inducer      | isothiourea_sulfonamide                                    |
| 6e  | good       | warning   | non inducer      | isothiourea_sulfonamide                                    |
| 8   | good       | warning   | non inducer      | amino_naphthalene                                          |
| 9a  | good       | bad       | non inducer      | amino_naphthalene                                          |
| 9b  | good       | bad       | non inducer      | amino_naphthalene                                          |
| 9c  | good       | warning   | non inducer      | amino_naphthalene                                          |
| 9d  | bad        | warning   | non inducer      | amino_naphthalene                                          |
| 9e  | bad        | warning   | non inducer      | amino_naphthalene                                          |
| 10  | good       | warning   | non inducer      | isothiourea_sulfonamide                                    |
| 11  | good       | warning   | non inducer      | -                                                          |
| Flu | good       | good      | non inducer      | -                                                          |
| Ket | good       | bad       | inducer          | too_many_atoms<br>aniline_no_h_newd<br>acetal_both_in_ring |

- Indicates not detected substructures according MedChem rules; isothiourea\_sulfonamide: this rule is an acylating-class rule and is referring to the presence of isothiourea sulfonylated on imine nitrogen; amino\_naphthalene: this rule is a nuisance-class rule and is referring at a type of interference that is not amenable to the substructure search, developed to flag interfering compounds that passed the substructure rules; too\_many\_atoms: this rule is a miscellaneous-class rule and is referring to the presence of over 25 non-hydrogen atoms; positive: this rule is an miscellaneous-class rule and is referring to the 50 demerits for each positive charge >1; aniline\_no\_h\_newd: this rule is a nitrogen-class rule and is referring to the presence of aniline (cannot have *ortho* or *para* electron withdrawing group); acetal\_both\_in\_ring: this rule is an aldehyde-class rule and is referring to the presence of acetal with both oxygen or sulphur in ring.

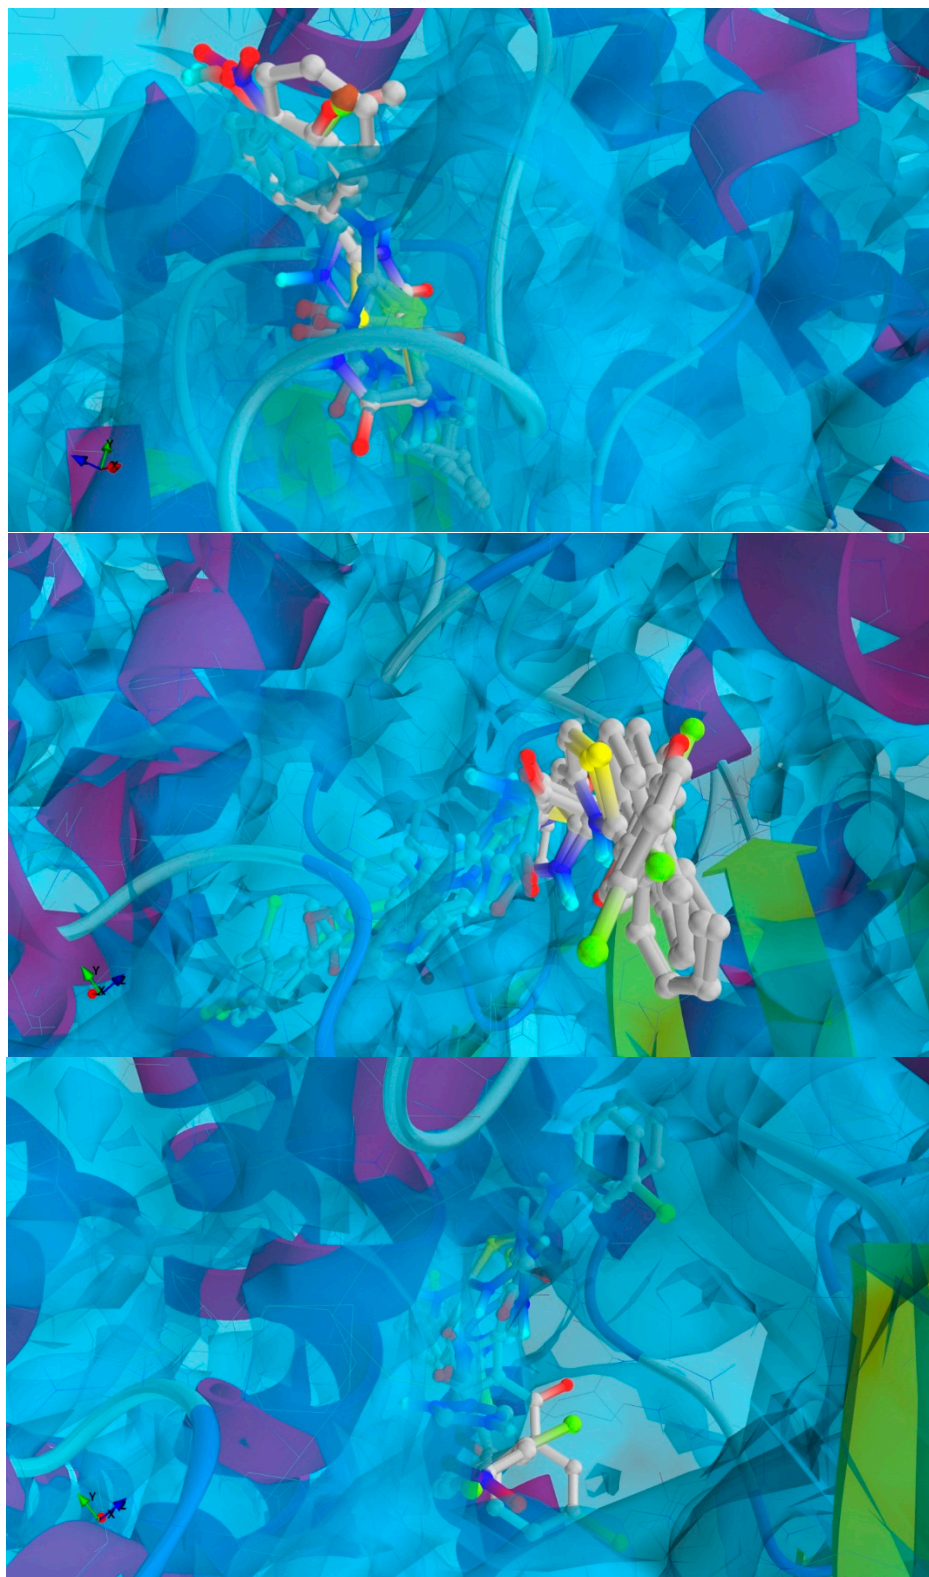

**Figure S1.** Detailed views of the docking poses of the screened compounds in the active site of lanosterol-14 $\alpha$ -demethylase (target is depicted as thin sticks with secondary structure drawn as cartoon backbone with simulation of the molecular surface (semitransparent light blue) for a better understanding of tridimensional positioning in the active site of enzyme, meanwhile ligands are figured as sticks): group A (top image: at the entry of the active site): **2**, **3a**, **3c**, **3f-h**, **5**, **8**, **10** and **11**; group B (middle image: at opposite entry of the active site): **3b**, **3d-e**, **6d**, **9a-9c** and **Ket** (**9b-c** and **Ket** are binding in the distal region of this entry); group C (down image: deeply inside of the active site): **6a-c**, **6e** and **Flu**.
